# Supplementary material
Source: PubMed Central journal article supplement (PMC3131332)
Supplement: 1106501108_pnas.1106501108_SI.pdf [file 1106501108_pnas.1106501108_SI.pdf]

# Supporting Information

Lucks et al. 10.1073/pnas.1106501108

## SI Materials and Methods.

**Synthesis of *Bacillus subtilis* RNase P, pT181 sense RNAs.** A DNA template for transcription of each RNA, inserted in the context of the 3' flanking structure cassette (1), was generated by PCR [1 mL; containing 20 mM Tris (pH 8.4), 50 mM KCl, 2.5 mM MgCl<sub>2</sub>, 200 μM each dNTP, 500 nM each forward and reverse primer, 5 pM template, and 0.025 units/μL Taq polymerase; denaturation at 94 °C, 45 s; annealing 55 °C, 30 s; and elongation 72 °C, 1 min; 34 cycles]. The PCR product was recovered by ethanol precipitation and resuspended in 150 μL of TE [10 mM Tris (pH 8.0), 1 mM EDTA]. Transcription reactions (1.0 mL, 37 °C, 12–14 h) contained 40 mM Tris (pH 8.0), 20 mM MgCl<sub>2</sub>, 10 mM DTT, 2 mM spermidine, 0.01% (vol/vol) Triton X-100, 5 mM each NTP, 50 μL of PCR-generated template, 0.12 U/μL RNase Inhibitor (Promega), and 0.1 mg/mL of T7 RNA polymerase. The RNA products were purified by denaturing polyacrylamide gel electrophoresis (8% polyacrylamide, 7 M urea, 29:1 acrylamide:bisacrylamide, 32 W, 2 h), excised from the gel, and recovered by passive elution and ethanol precipitation. The purified RNA (approximately 3 nmol) was resuspended in 200 μL TE. All RNAs except for the “non-bar-coded” RNase P RNA contained a four nucleotide degenerate bar code between the reverse transcriptase primer binding site and the 3' linker region within the 3' flanking structure cassette (Table S1).

**Structure-Selective RNA Modification.** All RNAs were modified with 1M7 (6.5 mM, final) as described previously with minor modifications for the analysis by deep sequencing (2). For the deep sequencing samples, RNAs (50 pmol) were folded in a volume of 90 μL and modified in a total volume of 50 μL. Recovered modified RNA was resuspended in 10 μL of 1/2 × TE. Each library used a 100 pmol total of RNA [50 pmol for each the (+) and the (–) reactions]. For the RNase P library 50 pmols each of non-bar-coded RNA and bar-coded RNA was used (257 total different RNAs). For the more complex mixture library, 14.2 pmol of each RNA was used (seven total different RNAs).

**SHAPE (Selective 2'-Hydroxyl Acylation Analyzed by Primer Extension) Analysis by Deep Sequencing.** The general procedure for first strand cDNA synthesis was carried out following the primer extension protocol outlined elsewhere (3) except that reverse transcription primers were unlabeled and the 5' end contained a sequence corresponding to A\_adapter\_t (4) (AATGATACGGCGAC-CACCGAGATCTACACTCTTCCCTACACGACGCTCTTC-CGATCT) and a handle of RRRY (R = A,G; Y = C,T) or YYR for (+) and (–) primer extension reactions, respectively. Other exceptions were the total amount of primer used in primer extension reactions was 9 pmol and a 95 °C heat step was added prior to primer annealing to reduce possible intermolecular interactions of the primer. After primer extension, RNA was hydrolyzed by adding NaOH (1 μL, 4 M) and incubating for 5 min at 95 °C. cDNAs were ethanol precipitated and resuspended in 35.5 μL of nuclease-free water. A\_adapter\_b (4)

(AGATCGGAAGAGCGGTTCAGCAGGAATGCCGAGACCGATCTCGTATGCCGTCTTCTGCTTG) modified with a 3'-C3 spacer group was ligated to each cDNA using a ssDNA ligase (CircLigase, Epicentre Biotechnologies) [100 μL; 50 mM MOPS (pH 7.5), 10 mM KCl, 5 mM MgCl<sub>2</sub>, 1 mM DTT, 0.05 mM ATP, 2.5 mM MnCl<sub>2</sub>, 5 μM A\_adapter\_b, and 200 U ligase] and incubating for 6 h at 68 °C in a thermal cycler. Separate ligation reactions were carried out for the (+) and (–) cDNA library pools. The ligation reactions were stopped by heating to

80 °C for 10 min, recovered by ethanol precipitation, and resuspended in 20 μL of nuclease-free water. Excess A\_adapter\_b was removed using Agencourt Ampure XP beads (A63880). Finally, 9 or 12 cycles of PCR amplification were performed on the library using primers that bind to the Illumina adapter sequences, followed by cleanup with Agencourt Ampure XP beads (5). No size selection was performed on the resulting adapter-ligated library. Libraries were assayed for quality (on an Agilent Bioanalyzer 2100 using a high-sensitivity DNA chip) by comparing 9- and 12-cycle amplification, looking for characteristic peaks and peak enrichment (Fig. S9). Libraries were sequenced on an Illumina Genome Analyzer Ix following the manufacturer's standard cluster generation and sequencing protocols, for 50 cycles of sequencing per paired-end read (6). Data available upon request.

**Bioinformatic Analysis of Bar-Coded Sequencing Reads.** Reads for reverse transcription (RT) fragments were first split into 1M7-treated and -untreated pools by examining the 4 nucleotide handle sequence on the 5' end of the read generated from the 3' end of each RNA probed in the experiment. Reads with an RRRY handle identified (+) fragments and those with YYR identified (–) fragments. This handle was then trimmed from each read to allow alignment of the reads to probed RNAs. Reads were then trimmed for A\_adapter\_b and A\_adapter\_t using the FASTX toolkit [[http://hannonlab.cshl.edu/fastx\\_toolkit/](http://hannonlab.cshl.edu/fastx_toolkit/)], because RT products shorter than the length of a sequencing read will produce reads with adapter at their 3' ends.

Paired reads were optimally aligned to the probed RNAs using Bowtie 0.12.8 (7) with the parameters -best -X 2000 -y -m 1, and allowing no mismatches in the alignments with parameters -v 0. The 3' end of each fragment alignment (toward the 5' end of the probed RNA) corresponds to the point at which RT stopped. Two counters (one for the 1M7 condition and one for the control condition) at each position of each probed RNA position were used to track RT stopping points. The (+) counter for a probed RNA at position *i* was incremented when a fragment from the (+) pool aligned to the RNA starting at position (*i* + 1) and ending at the RNA's 3' end. The (–) counter was incremented for (–) pool fragment alignments. These RT-stop counts were then used to calculate maximum likelihood reactivities.

**Calculating Jensen–Shannon Divergences (JSD).** Jensen–Shannon divergences between two sets of reactivities,  $\Theta^1$  and  $\Theta^2$ , were calculated according to the formula

$$\text{JSD}_{1,2} = H(\Theta^{\text{avg}}) - \frac{1}{2}(H(\Theta^1) + H(\Theta^2)),$$

where

$$H(\Theta) = -\sum_i \theta_i \ln \theta_i.$$

$\theta_i$  is the reactivity at position *i*, and  $\Theta^{\text{avg}}$  is the average of  $\Theta^1$  and  $\Theta^2$ .

**Secondary Structure Prediction Using SHAPE-Seq Reactivity Constraints.** SHAPE intensities were converted into a pseudo-free-energy change term in the RNAstructure program (8):

$$\Delta G_{\text{SHAPE}} = m^* \ln[\text{SHAPE-Seq reactivity} + 1.0] + b.$$





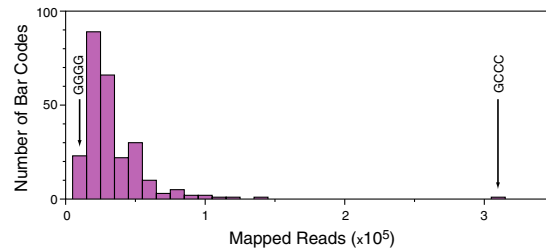

Fig. S4. RNaseP bar code counts distribution. The range of mapped reads for each bar code was from 10,488 (GGGG) to 308,978 (GCCC).

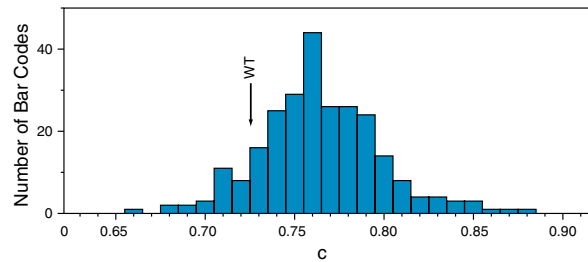

Fig. S5. Distribution of  $c$  over bar-coded RNasePs. The average  $c$  over all bar codes is 0.76, which is close to the  $c$  for the WT (un-bar-coded) RNaseP sequence, 0.73.

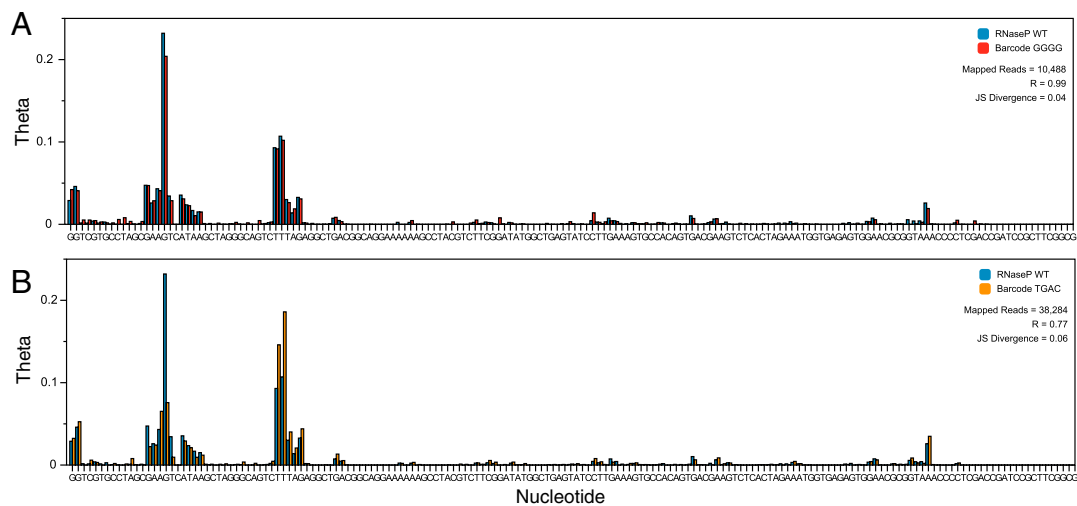

Fig. S6. Comparison of WT RNaseP with bar-coded RNasePs. (A) Comparison with the GGGG bar code, which had the minimum number of fragments, mapped (Fig. S4). This number of fragments corresponded to approximately 0.1 pmol of starting RNA, but still yielded highly accurate SHAPE reactivities. (B) Comparison with the TGAC bar code, which gave the worst Jensen–Shannon divergence and  $R$  with the WT  $\Theta$  (Fig. 2C). It is clear from the plot of  $\Theta$  that the overall reactivities are accurately captured and that the high JSD and low  $R$  result from a few positions in the highly reactive loops having different absolute reactivities. We note that these positions would all be classified as being “highly reactive,” and thus this reactivity spectrum would be interpreted exactly the same as the WT RNaseP spectrum. The WT RNaseP  $\Theta$  were derived from over 7.5 million sequencing reads.
